# Supplementary material for: Construction of a fecal immune-related protein-based biomarker panel for colorectal cancer diagnosis: a multicenter study
Source: PubMed Central journal article supplement (PMC10258350; doi:10.3389/fimmu.2023.1126217), 2023-05-29
Supplement: Image_2.pdf [file Image_2.pdf]

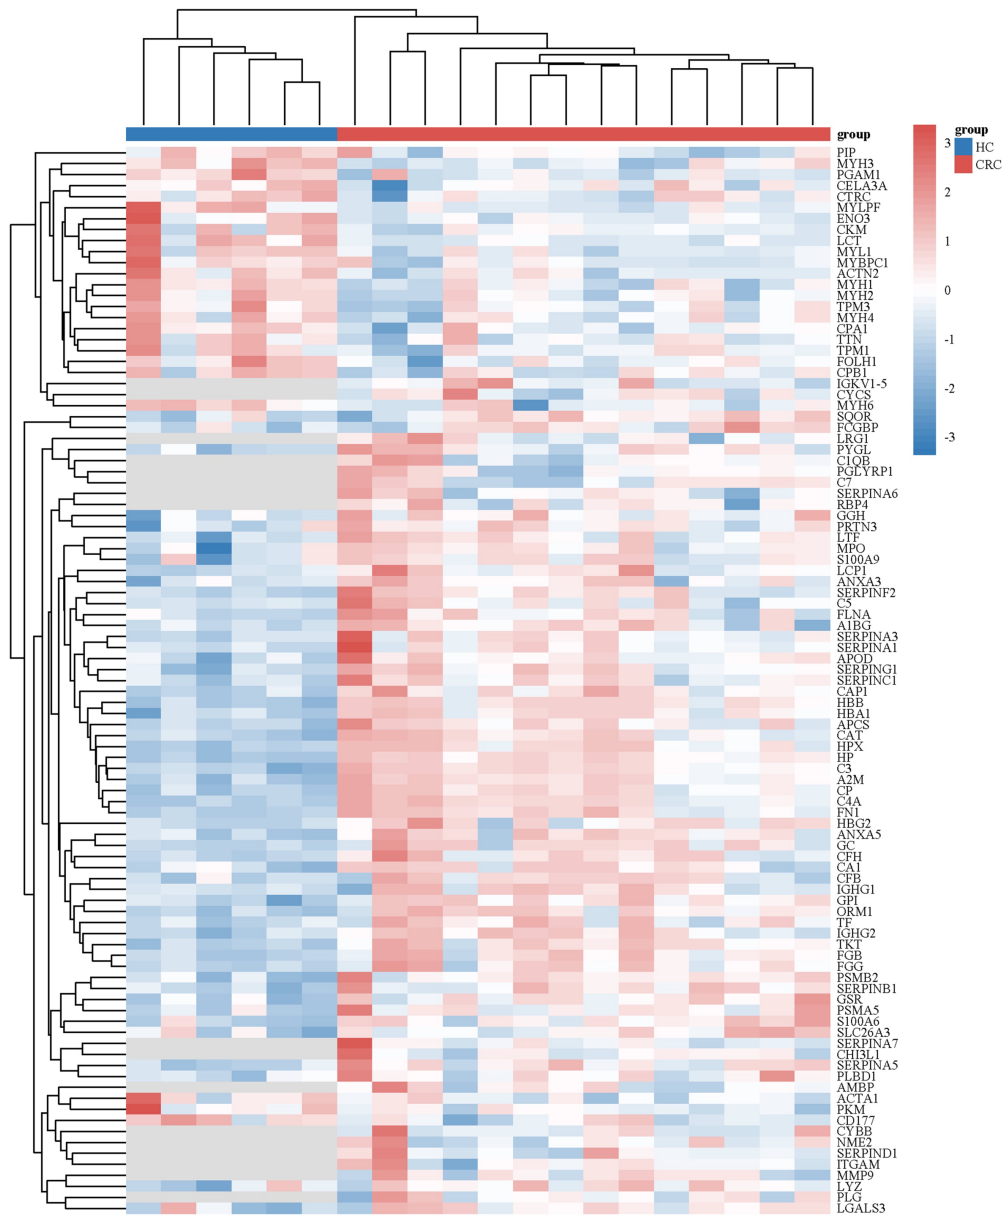

**Supplementary Figure 2. Cluster heatmap of 97 differentially expressed fecal proteins.**

The criteria for differential expression of proteins were  $|\log_2\text{-fold change}| > 0.263$  and  $P < 0.05$ .
