# Supplementary material for: Construction of a fecal immune-related protein-based biomarker panel for colorectal cancer diagnosis: a multicenter study
Source: PubMed Central journal article supplement (PMC10258350; doi:10.3389/fimmu.2023.1126217), 2023-05-29
Supplement: Image_3.pdf [file Image_3.pdf]

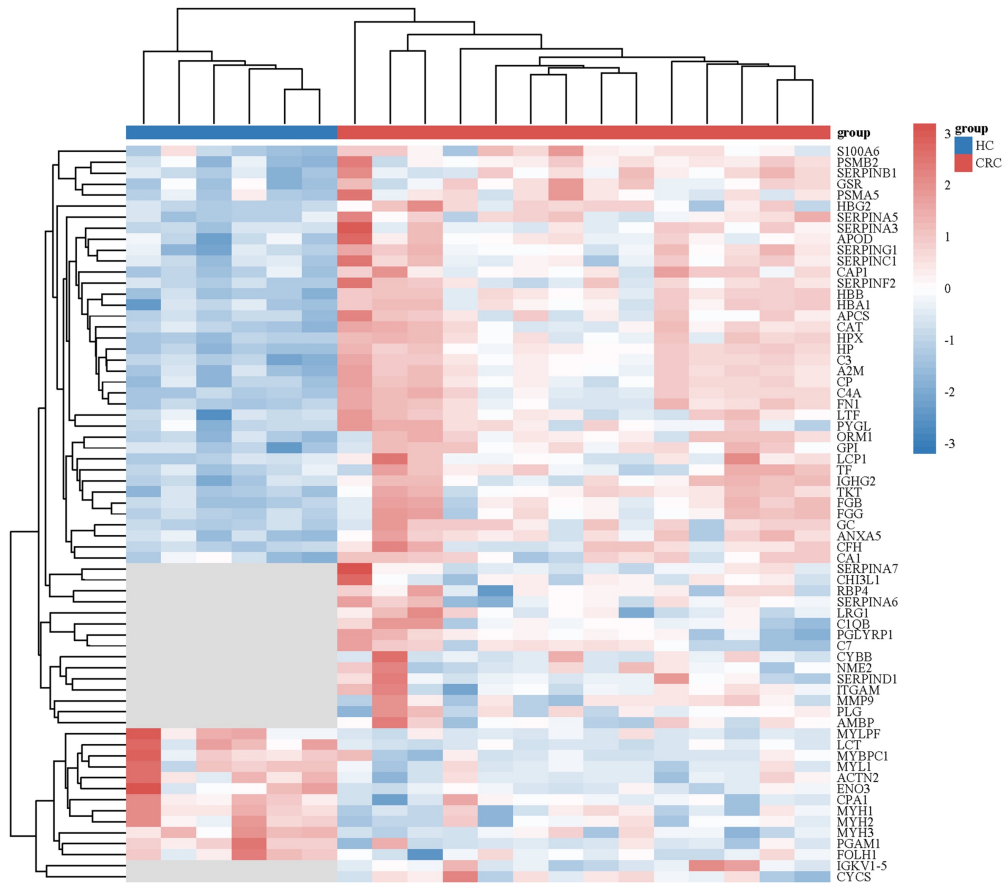

**Supplementary Figure 3. Cluster heatmap of 67 differentially expressed stool proteins according to more stringent criteria.** The criteria for differential expression of proteins were  $|\log_2\text{-fold change}| > 1$  and  $P < 0.01$ .
