# Supplementary material for: Construction of a fecal immune-related protein-based biomarker panel for colorectal cancer diagnosis: a multicenter study
Source: PubMed Central journal article supplement (PMC10258350; doi:10.3389/fimmu.2023.1126217), 2023-05-29
Supplement: Image_6.pdf [file Image_6.pdf]

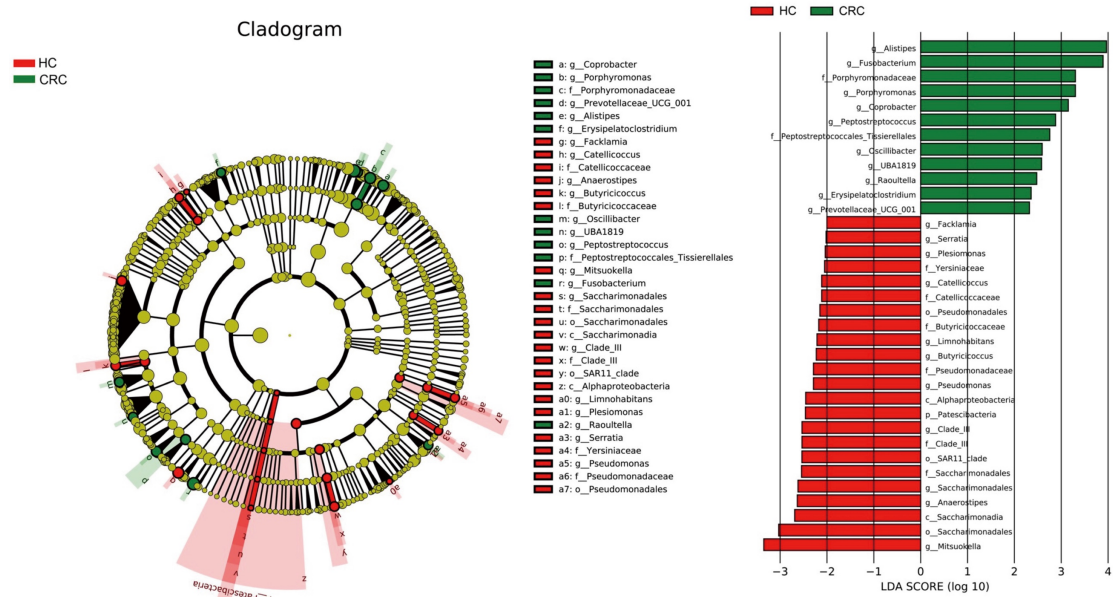

**Supplementary Figure 6. Identification of differentially abundant microorganisms in the gut microbiota by LefSe analysis.** The criterion for identifying differentially abundant microbes is an absolute value of the LDA score > 2.
